# Supplementary material
Source: Springer Nature journal article supplement (https://www.springermedizin.de/resource/supplementary/12885_2009_1959_MOESM1_ESM.pdf/9460186)

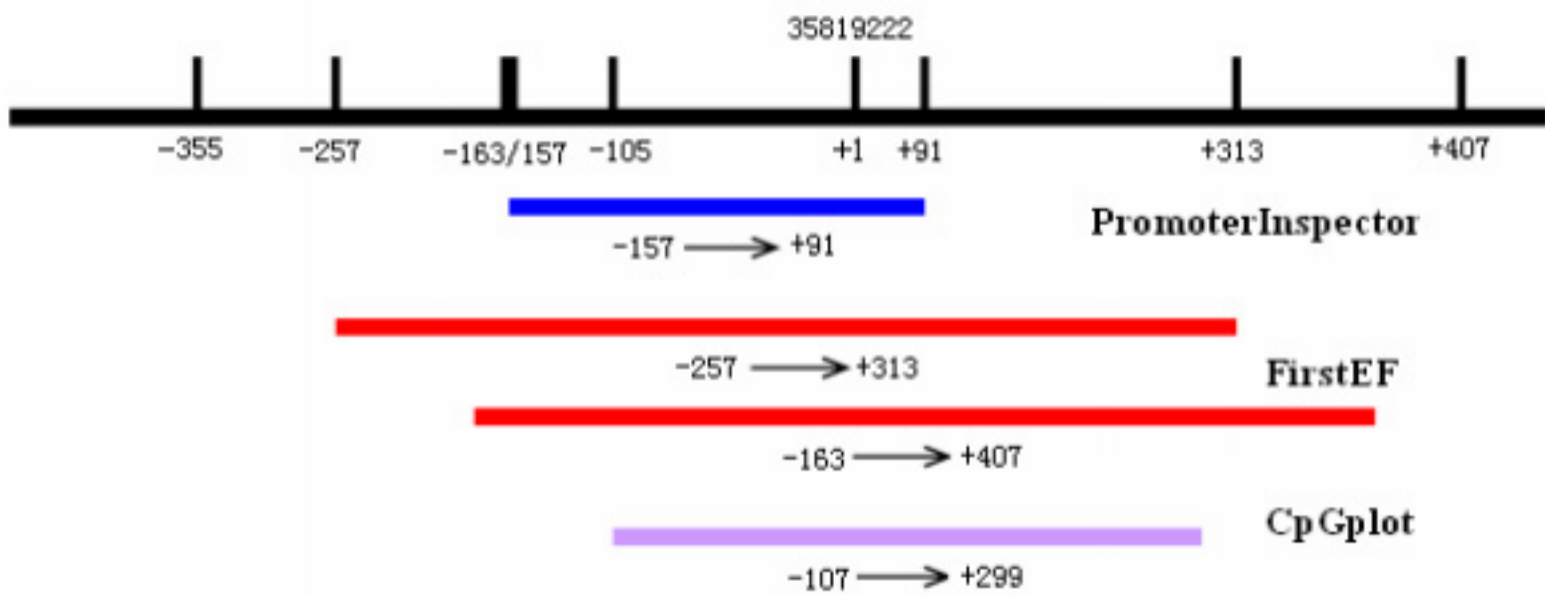

Supplement: MOESM1 [file 9460186]
